# Supplementary material
Source: HighWire-hosted journal article supplement (https://tobaccocontrol.bmj.com/content/tobaccocontrol-2016-053224)
Supplement: inline-supplementary-material-1 [file inline-supplementary-material-1.pdf]

Supplemental Table S1. Acronyms and Abbreviations

| <b>Acronym or Abbreviation</b> | <b>Definition</b>                                            |
|--------------------------------|--------------------------------------------------------------|
| 3T3                            | 3T3 mouse embryonic fibroblast cell line                     |
| A549                           | Human alveolar epithelial cell line                          |
| ANOVA                          | Analysis of variance                                         |
| DNA                            | Deoxyribonucleic acid                                        |
| FEMA                           | Flavor and Extracts Manufactures Association                 |
| GC/MS                          | Gas chromatography and mass spectrometry                     |
| GRAS                           | Generally recognized as safe                                 |
| hESC                           | Human Embryonic Stem Cells                                   |
| hPF                            | Human Pulmonary Fibroblasts                                  |
| Hr(s)                          | Hour(s)                                                      |
| IC <sub>50</sub>               | Half maximal inhibitory concentration                        |
| LOAEL                          | Lowest observed adverse effect level                         |
| <i>M</i>                       | Molar                                                        |
| Min                            | Minute                                                       |
| MTT                            | 3-(4,5-Dimethylthiazol-2-yl)-2,5-Diphenyltetrazolium Bromide |
| NOAEL                          | No observed adverse effect level                             |
| PBS                            | Phosphate-buffered saline                                    |
| TPE                            | Total puff equivalence                                       |
| V                              | Volts                                                        |
| W                              | Watt                                                         |
