# Supplementary material
Source: HighWire-hosted journal article supplement (https://tobaccocontrol.bmj.com/content/tobaccocontrol-2016-053224)
Supplement: inline-supplementary-material-2 [file inline-supplementary-material-2.pdf]

Supplemental Table S2. Concentration of Cinnamaldehyde Detected in Refill Fluids

---

| <b>Refill Fluid # and Flavor</b>              | <b>Cinnamaldehyde Concentration (µg/mL)</b> |
|-----------------------------------------------|---------------------------------------------|
| 16 Summer Peach                               | 2.2                                         |
| 15 Simply Strawberry                          | 2.7                                         |
| 28 Caramel                                    | 3.3                                         |
| 12 French Vanilla                             | 3.5                                         |
| 11 Espresso                                   | 4.0                                         |
| 26 Caramel                                    | 4.8                                         |
| 81 Espresso – Duplicate                       | 5.0                                         |
| 17 Tennessee Cured (Medium Nicotine)          | 5.5                                         |
| 31 Tennessee Cured (Low Nicotine)             | 10.8                                        |
| 51 Tennessee Cured (Low Nicotine – Duplicate) | 11.9                                        |
| 34 Johnson Creek Original (Low Nicotine)      | 14.0                                        |
| 9 Black Cherry                                | 25.9                                        |
| 27 Caramel                                    | 28.8                                        |
| 42 Cinnamon                                   | 475.9                                       |
| 61 Cinnabun                                   | 564.6                                       |
| 73 Mercado – Duplicate                        | 2,752.0                                     |
| 3 Mercado                                     | 2,768.6                                     |
| 60 Cinnamon                                   | 6,711.0                                     |
| 54 Cinnamon Flavour Art                       | 9,713.7                                     |
| 65 Cinnamon E-liquid                          | 13,164.5                                    |
| 22 Cinnamon Ceylon Flavour Art                | 25,752.1                                    |
| 58 Cinna-Bomb x2                              | 110,477.1                                   |
| 53 Sinful Cinnamon                            | 140,462.7                                   |
| 69 Sinful Cinnamon – Duplicate                | 154,705.3                                   |

---
